# Supplementary material for: Discrimination of Diptera order insects based on their saturated cuticular hydrocarbon content using a new microextraction procedure and chromatographic analysis
Source: Royal Society of Chemistry journal article supplement (doi:10.1039/d4ay00214h), 2024-01-01
Supplement: d4ay00214h1.pdf [file d4ay00214h1.pdf]

## Supplementary material

### Discrimination of Diptera order insects based on their saturated cuticular hydrocarbon content using a new microextraction procedure and chromatographic analysis

L.O. León-Morán,<sup>a</sup> M. Pastor-Belda,<sup>a,c</sup> P. Viñas,<sup>a,c</sup> N. Arroyo-Manzanares,<sup>a,c</sup> M.-D. García,<sup>b,c</sup> M.I. Arnaldos,<sup>b,c</sup> and N. Campillo<sup>a,c</sup>

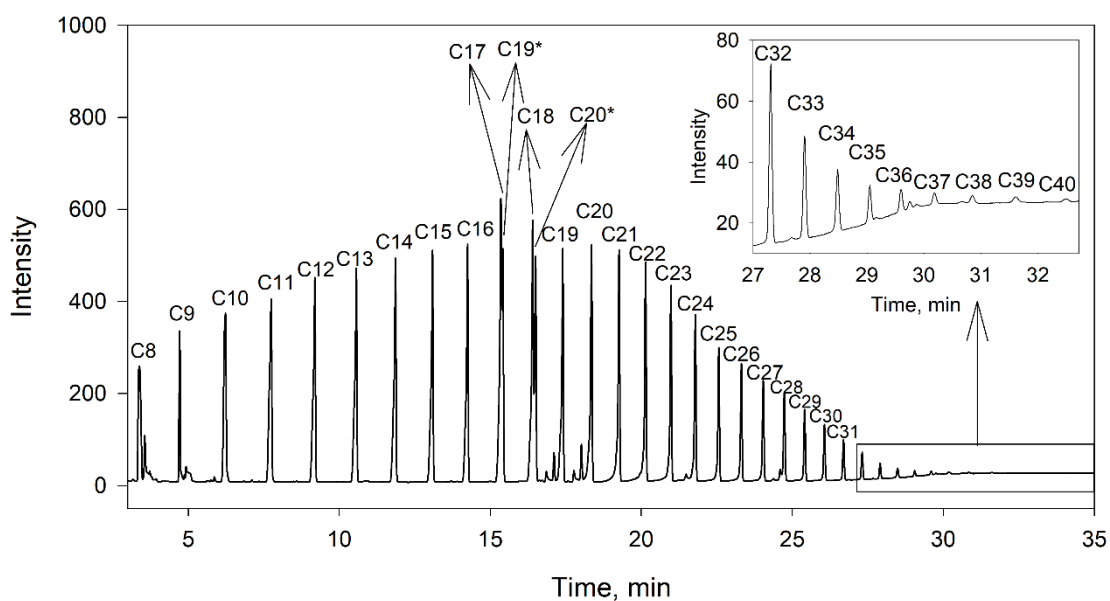

Fig. S1 Chromatogram obtained by DLLME with GC-FID for a standard solution at  $1 \mu\text{g mL}^{-1}$ .

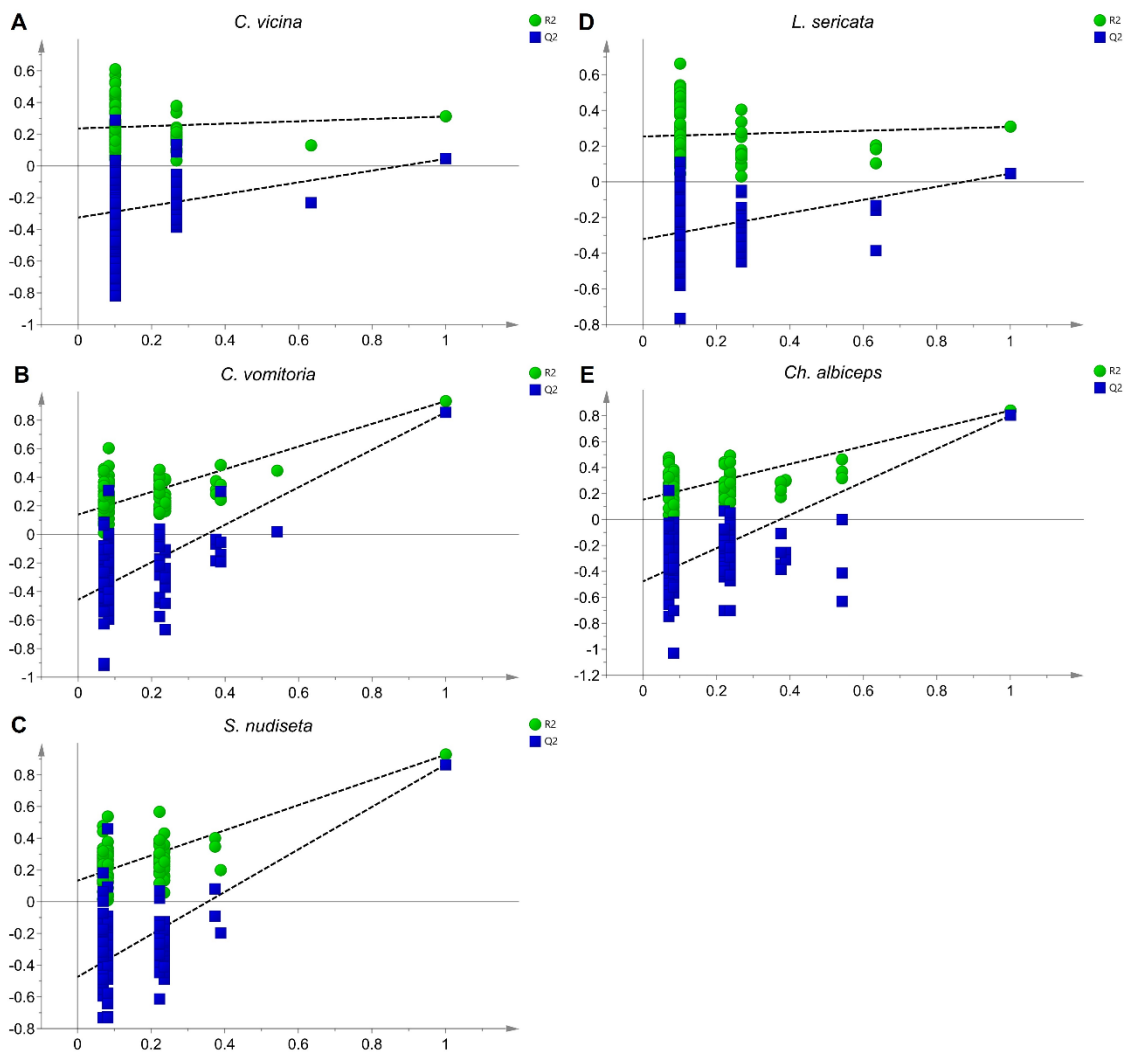

Fig. S2 Permutation plot for the optimal OPLS-DA model using 100 random permutations.

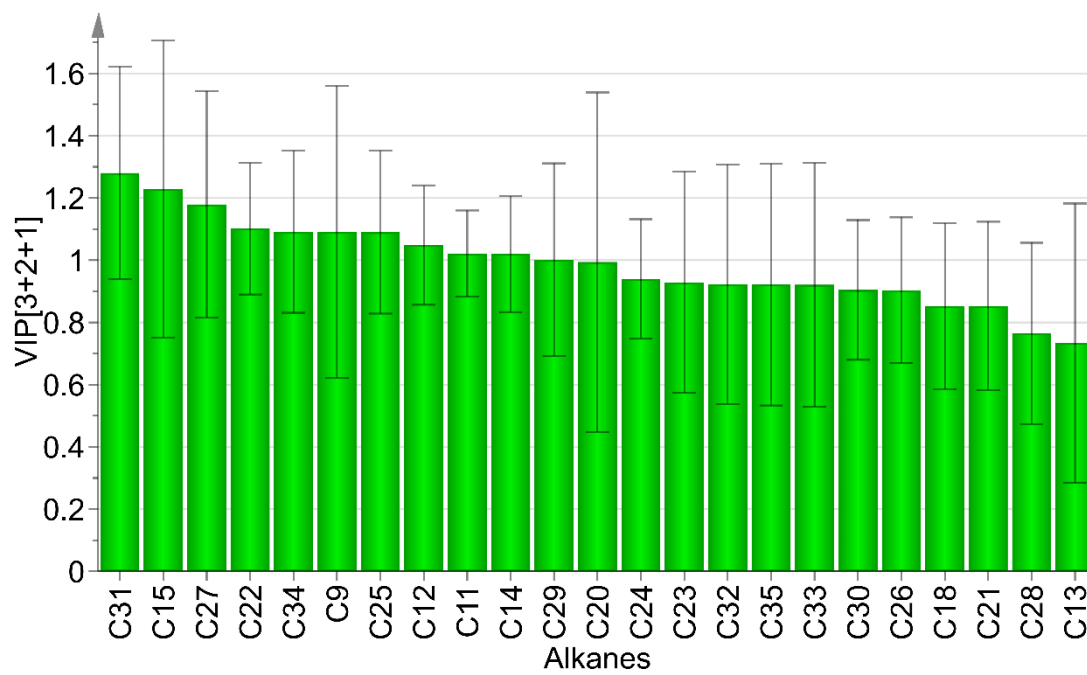

Fig. S3 The VIP score plot of the OPLS-DA model.

**Table S1** Validation parameters for DLLME with GC-FID analysis of the n-alkanes

| Analyte | Linearity,<br>ng mL <sup>-1</sup> | RSD <sup>a</sup> , %       |                            |                             | Analyte | Linearity,<br>ng mL <sup>-1</sup> | RSD <sup>a</sup> , %       |                            |                             |
|---------|-----------------------------------|----------------------------|----------------------------|-----------------------------|---------|-----------------------------------|----------------------------|----------------------------|-----------------------------|
|         |                                   | 300<br>ng mL <sup>-1</sup> | 800<br>ng mL <sup>-1</sup> | 1200<br>ng mL <sup>-1</sup> |         |                                   | 300<br>ng mL <sup>-1</sup> | 800<br>ng mL <sup>-1</sup> | 1200<br>ng mL <sup>-1</sup> |
| C8      | 2-2500                            | 4.1                        | 3.8                        | 3.9                         | C24     | 2-2500                            | 2.8                        | 2.0                        | 2.4                         |
| C9      | 2-2500                            | 3.3                        | 3.1                        | 3.0                         | C25     | 2-2500                            | 2.6                        | 2.2                        | 2.1                         |
| C10     | 1.5-2500                          | 2.6                        | 1.9                        | 1.1                         | C26     | 2.5-2500                          | 3.7                        | 3.4                        | 3.5                         |
| C11     | 1.5-2500                          | 1.6                        | 1.5                        | 1.2                         | C27     | 2.5-2500                          | 2.1                        | 2.3                        | 2.6                         |
| C12     | 1.5-2500                          | 2.3                        | 2.0                        | 1.9                         | C28     | 5-2500                            | 2.5                        | 2.6                        | 2.4                         |
| C13     | 1.5-2500                          | 2.6                        | 2.1                        | 2.0                         | C29     | 5-2500                            | 2.8                        | 2.5                        | 2.5                         |
| C14     | 1.5-2500                          | 3.5                        | 2.1                        | 2.9                         | C30     | 10-2500                           | 2.2                        | 2.1                        | 2.0                         |
| C15     | 1.5-2500                          | 2.8                        | 1.9                        | 2.0                         | C31     | 10-2500                           | 2.0                        | 2.4                        | 2.5                         |
| C16     | 1.5-2500                          | 1.9                        | 1.9                        | 2.1                         | C32     | 20-2500                           | 4.8                        | 4.6                        | 5.1                         |
| C17     | 1-2500                            | 3.9                        | 3.1                        | 2.9                         | C33     | 20-2500                           | 5.7                        | 6.0                        | 5.5                         |
| C19*    | 2-2500                            | 4.9                        | 5.3                        | 5.0                         | C34     | 50-2500                           | 8.6                        | 8.3                        | 8.8                         |
| C18     | 1.5-2500                          | 2.2                        | 2.3                        | 2.5                         | C35     | 50-1500                           | 8.3                        | 9.1                        | 9.5                         |
| C20*    | 2-2500                            | 3.1                        | 3.8                        | 3.5                         | C36     | 100-1500                          | 9.6                        | 9.8                        | 9.9                         |
| C19     | 1.5-2500                          | 1.9                        | 1.8                        | 2.2                         | C37     | 100-1500                          | 10.0                       | 10.2                       | 10.6                        |
| C20     | 1.5-2500                          | 1.8                        | 2.0                        | 1.5                         | C38     | 150-1500                          | 10.9                       | 11.5                       | 11.7                        |
| C21     | 1.5-2500                          | 2.2                        | 1.7                        | 1.9                         | C39     | 150-1500                          | 11.3                       | 11.0                       | 11.5                        |
| C22     | 1.5-2500                          | 2.0                        | 1.8                        | 1.8                         | C40     | 250-1500                          | 12.9                       | 13.5                       | 13.4                        |
| C23     | 2-2500                            | 2.0                        | 2.0                        | 2.6                         |         |                                   |                            |                            |                             |

<sup>a</sup>n = 12. \*Branched.
